# Supplementary material
Source: publisher site journal article supplement (https://www.dovepress.com/article/469866)
Supplement: Supplementary file 1 [file get_supplementary_file.php]

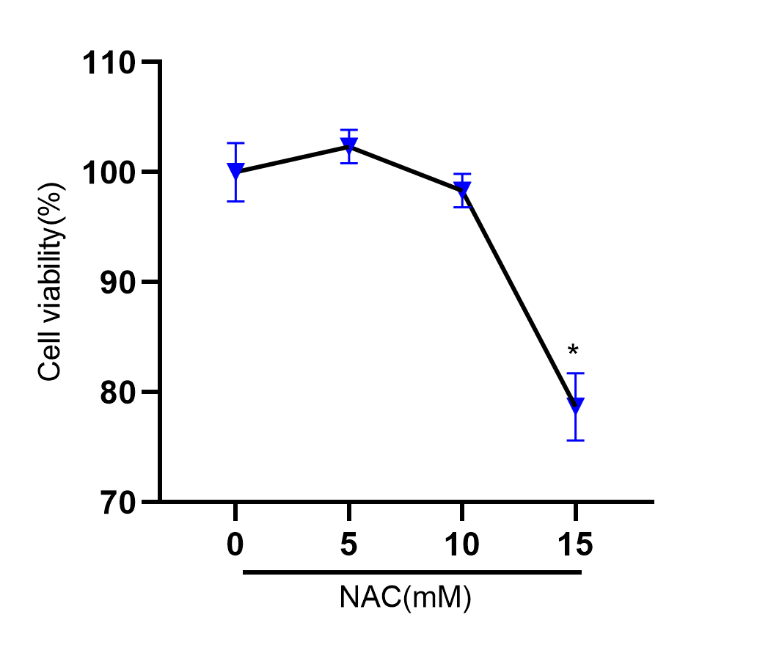


Supplementary Figure 1. **Measurement of cell viability after NAC treatment.** Cell viability measurement of Calu-3 cells after treatment with 0, 5, 10, 15 mM NAC for 24 h by CCK-8 assay(n=3). **P* < 0.01 compared with the control group.
